# Supplementary material for: Electrocatalytic valorization of waste polyethylene furanoate (PEF) bioplastics for the production of formic acid and hydrogen energy
Source: Royal Society of Chemistry journal article supplement (doi:10.1039/d3re00028a), 2023-01-01
Supplement: d3re00028a1.pdf [file d3re00028a1.pdf]

# Supporting Information

## Electrocatalytic conversion of waste polyethylene furanoate(PEF) for the production of formic acid and hydrogen energy

*Liwen Ren*<sup>1</sup>, *Sen Yang*<sup>2</sup>, *Jianying Wang*<sup>2</sup>, *Ting Zhang*<sup>2</sup>, *Xin Li*<sup>2</sup>, *Tianfu Wang*<sup>2,3\*</sup>, and *Yixin Zhao*<sup>2,3\*</sup>

1. China-UK Low Carbon College, Shanghai Jiao Tong University, Shanghai 201306, China
2. School of Environmental Science and Engineering, Shanghai Jiao Tong University, 800 Dongchuan Rd., Shanghai 200240, China
3. Shanghai Institute of Pollution Control and Ecological Security, Shanghai 200092, China.

\*Corresponding Author.

E-mail: [tfwang@sjtu.edu.cn](mailto:tfwang@sjtu.edu.cn) (Tianfu Wang)

[yixin.zhao@sjtu.edu.cn](mailto:yixin.zhao@sjtu.edu.cn) (Yixin Zhao)

## Figures

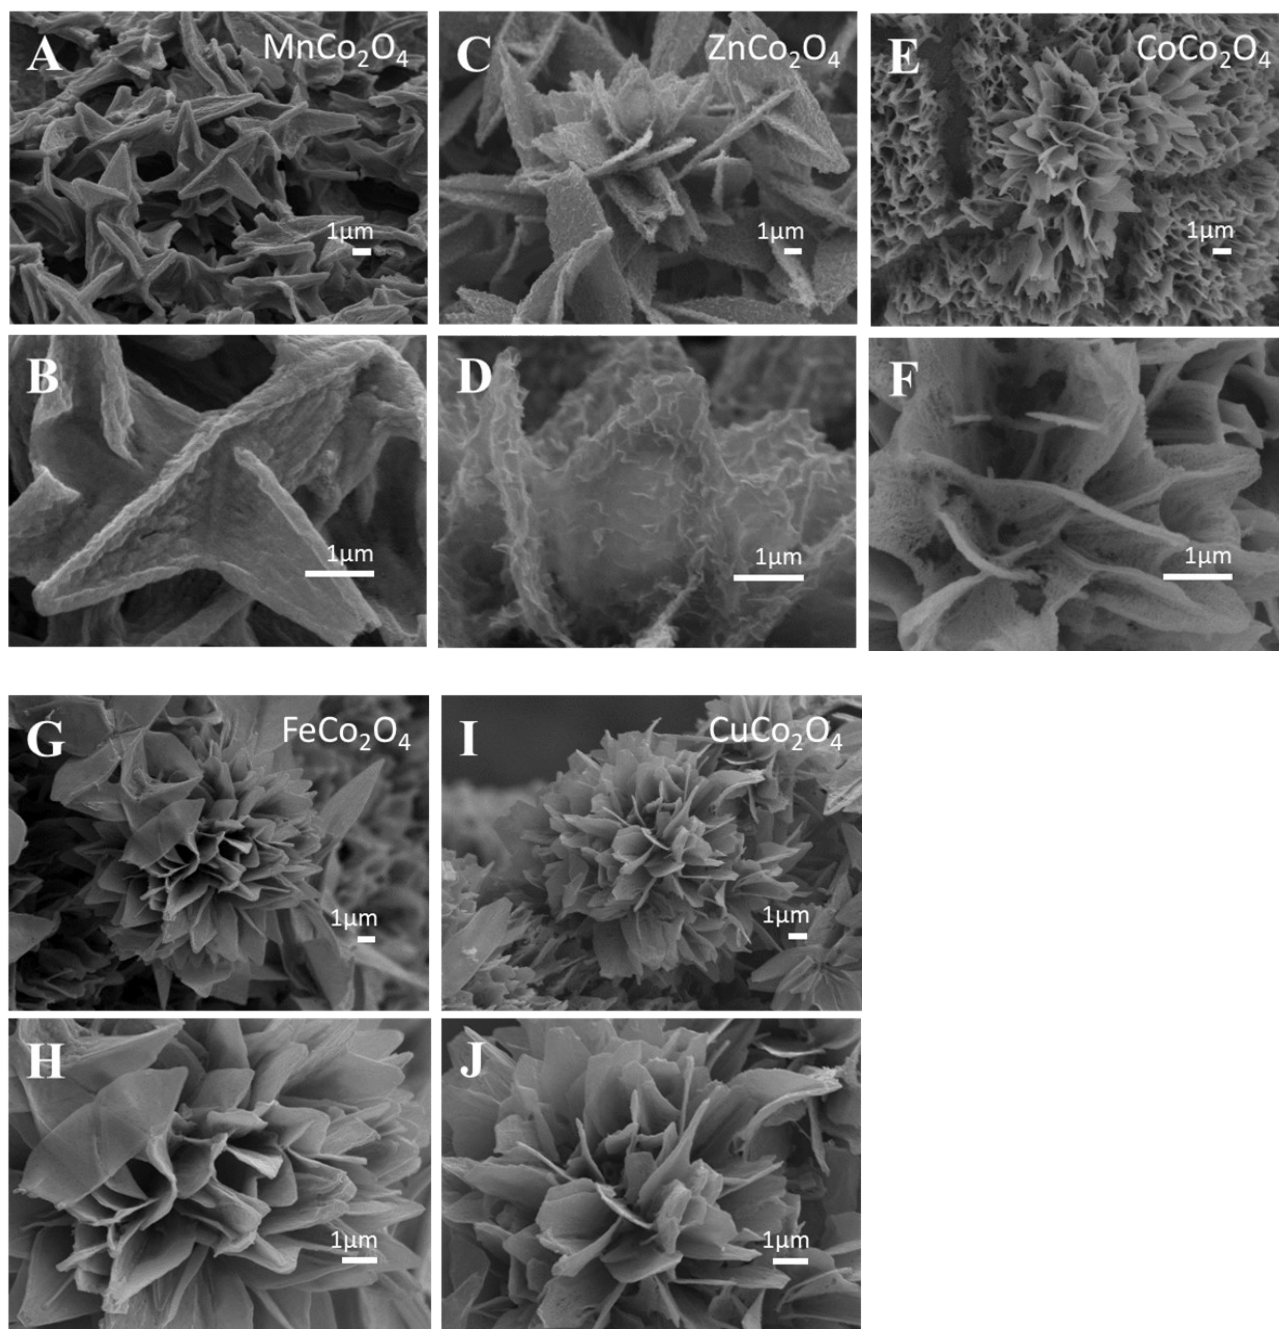

**Figure. S1.** Low- and high-magnification SEM images of the MnCo<sub>2</sub>O<sub>4</sub>, ZnCo<sub>2</sub>O<sub>4</sub>, CoCo<sub>2</sub>O<sub>4</sub>, FeCo<sub>2</sub>O<sub>4</sub>, and CuCo<sub>2</sub>O<sub>4</sub> nanoflower or nanowire arrays directly grown on NF.

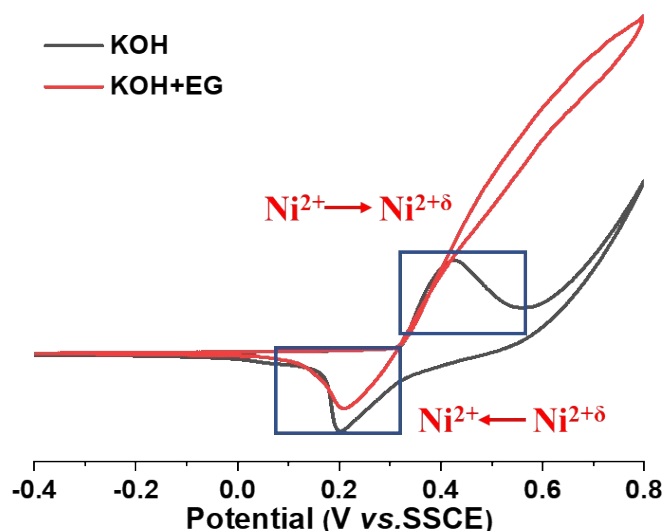

**Figure. S2.** Cyclic voltammetry curves in 1 M KOH solution with (red) and without (black) the presence of 0.1 M PEF hydrolysate for  $MCo_2O_4$ .

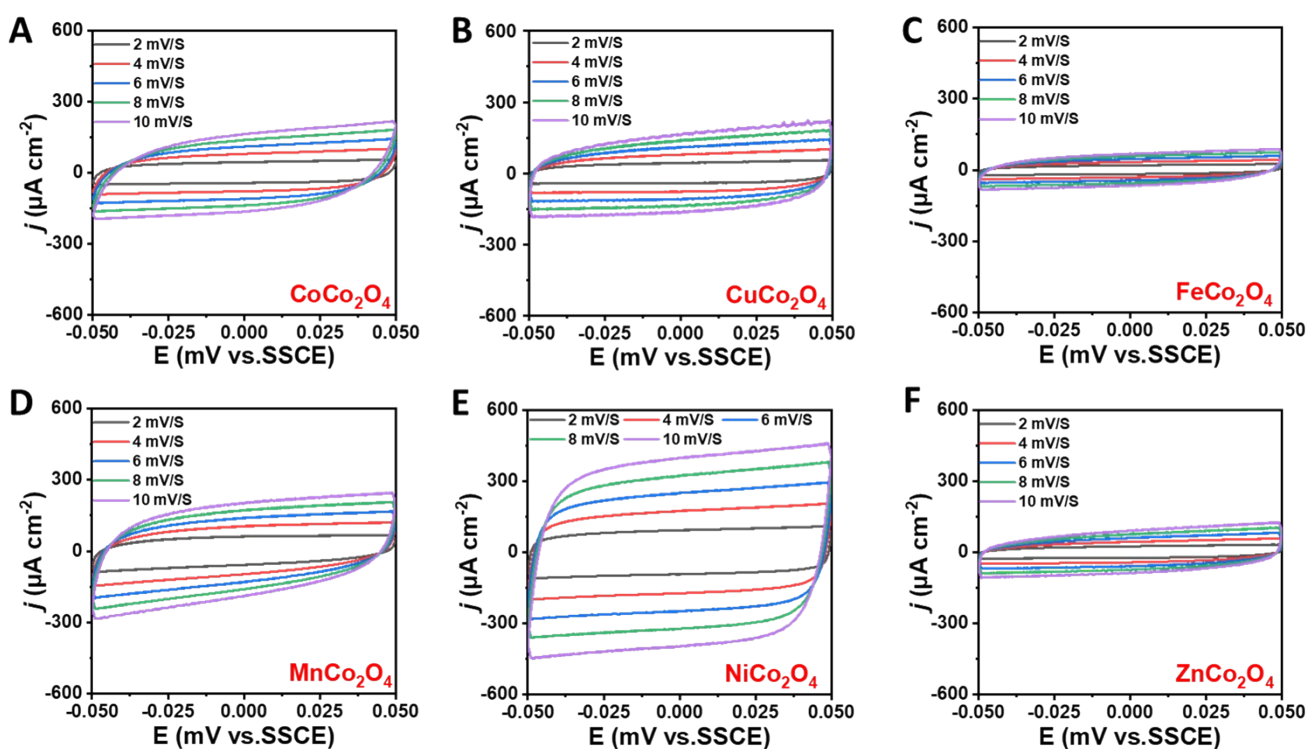

**Figure. S3.** Capacitive charging currents of  $MCo_2O_4$  electrode, as indicated in the figures, in the non-Faradaic potential region between -0.05 V - 0.05 V vs. SSCE at scan rates from 2 to 10 mV/s at an interval of 5 mV in 1 M KOH.

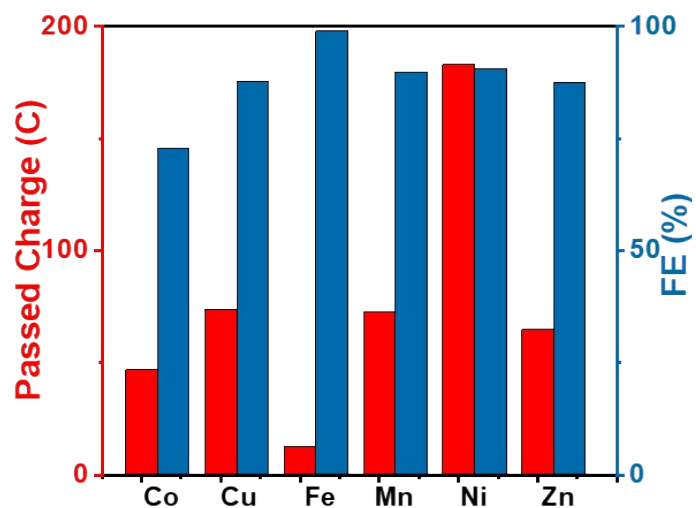

**Figure. S4.** EG conversion, Faradaic efficiency and formate yield of the electrolysis at 1.40 V using  $\text{NiCo}_2\text{O}_4$  electrode in 1 M KOH solution with 0.1 M EG for 3h.

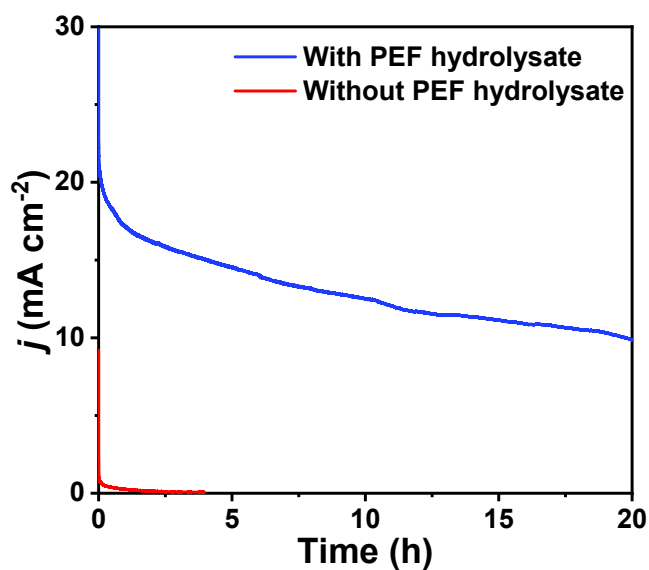

**Figure. S5.** Controlled-potential electrolysis at 1.40 V of  $\text{NiCo}_2\text{O}_4$  electrode in 1 M KOH solution with and without 0.1 M PEF hydrolysate.

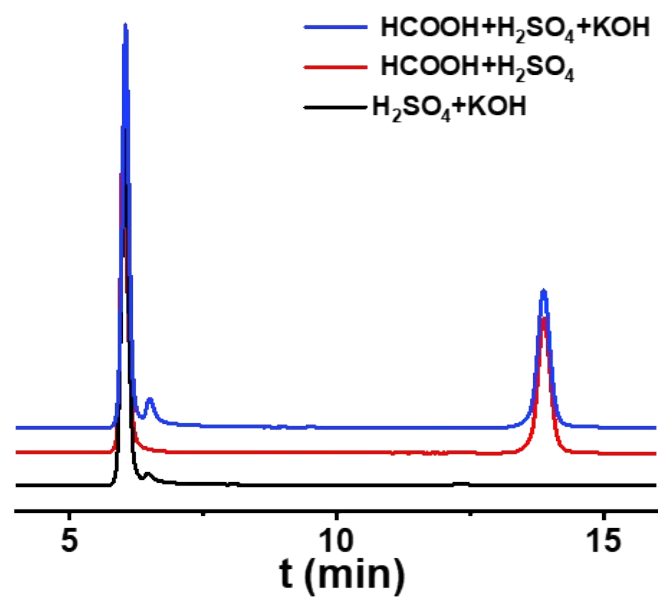

**Figure. S6.** HPLC spectrum of the mixed solution with concentration of KOH and H<sub>2</sub>SO<sub>4</sub>. The results data indicates that the peak at 6.0 and 6.5 min can be considered as background peak.

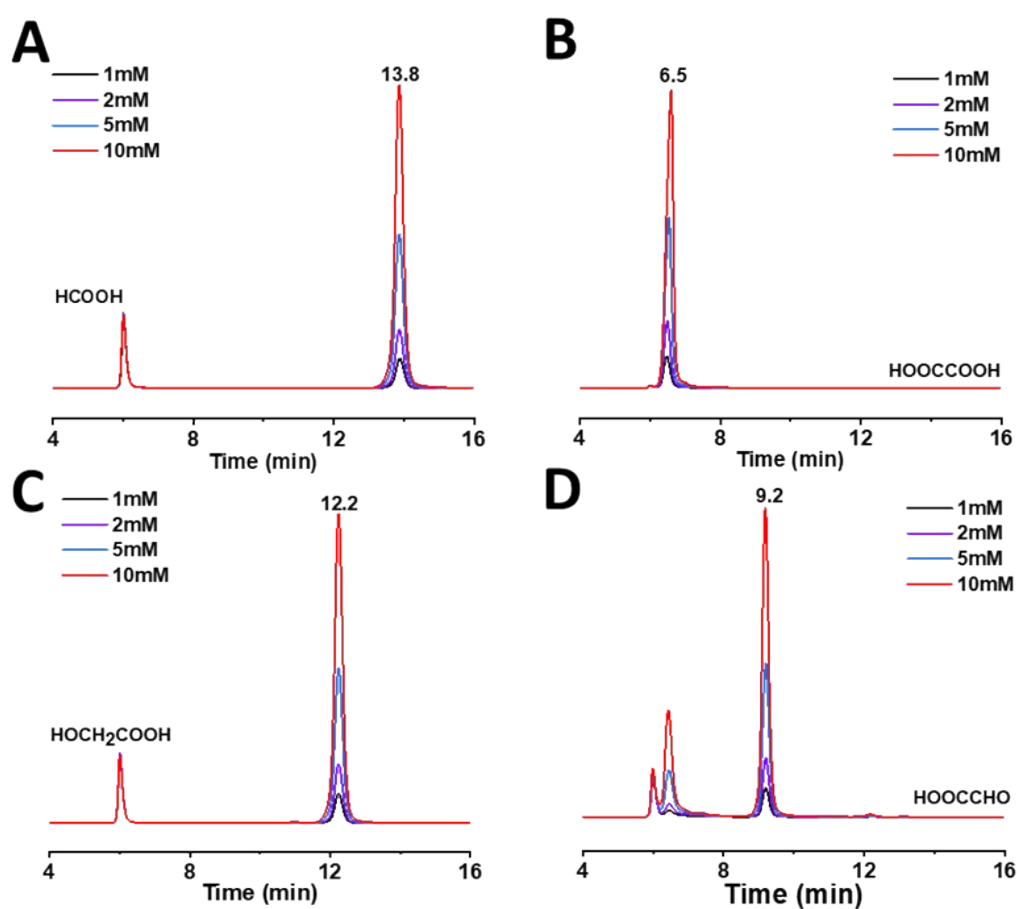

**Figure. S7.** Standard HPLC spectrum of various potential products derived from the EG oxidation, including (A) formic acid (B) oxalic acid (C) glycolic acid (D) glyoxylic acid.

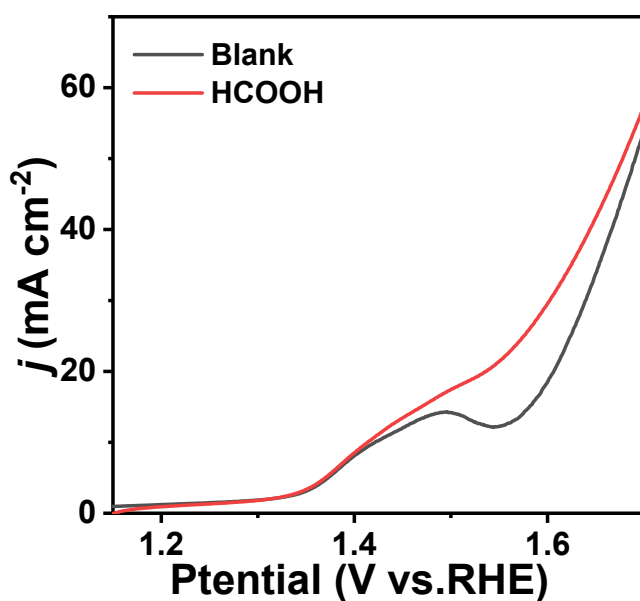

**Figure. S8.** LSV curves of NiCo<sub>2</sub>O<sub>4</sub> in 1 M KOH solution with and without adding 0.1 M formic acid.

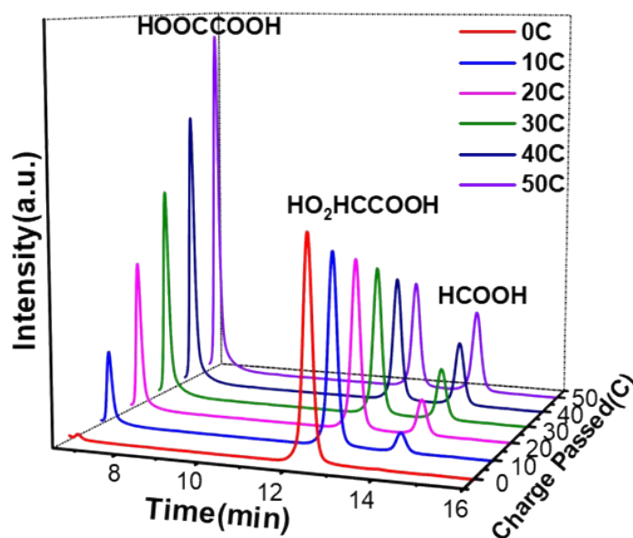

**Figure. S9.** HPLC spectrum of of the glycollic acid oxidation products at the constant potential of 1.40 V with different amounts of charge passed.
